# Supplementary material
Source: MDPI journal article supplement (https://www.mdpi.com/2079-6412/11/11/1397)
Supplement: s1 [file s1 › coatings-1452345-supplementary.pdf]

# Supplementary Materials: Green Synthesis of Carbon Encapsulated Magnetic Fe<sub>3</sub>O<sub>4</sub> Na-nanoparticles Using Hydrothermal Carbonization from Rattan Holocelluloses

Linxin Dai <sup>1</sup>, Zhi Jin <sup>2</sup>, Xinge Liu <sup>1</sup>, Long Feng <sup>1</sup>, Jianfeng Ma <sup>1,\*</sup>, Zhe Ling <sup>3,\*</sup>

<sup>1</sup> Key Lab of Bamboo and Rattan Science & Technology, International Center for Bamboo and Rattan, Beijing 100102, China; 2577810459@qq.com (L.D.); liuxinge@icbr.ac.cn (X.L.)

<sup>2</sup> Research Institute of Wood Industry, Chinese Academy of Forestry, Beijing 100091, China

<sup>3</sup> Innovation Center of Efficient Processing and Utilization of Forest Resources, College of Chemical Engineering, Nanjing Forestry University, Nanjing 210037, China

\* Correspondence: mjfxl31@126.com (J.M.); jjling19@njfu.edu.cn (Z. L.)

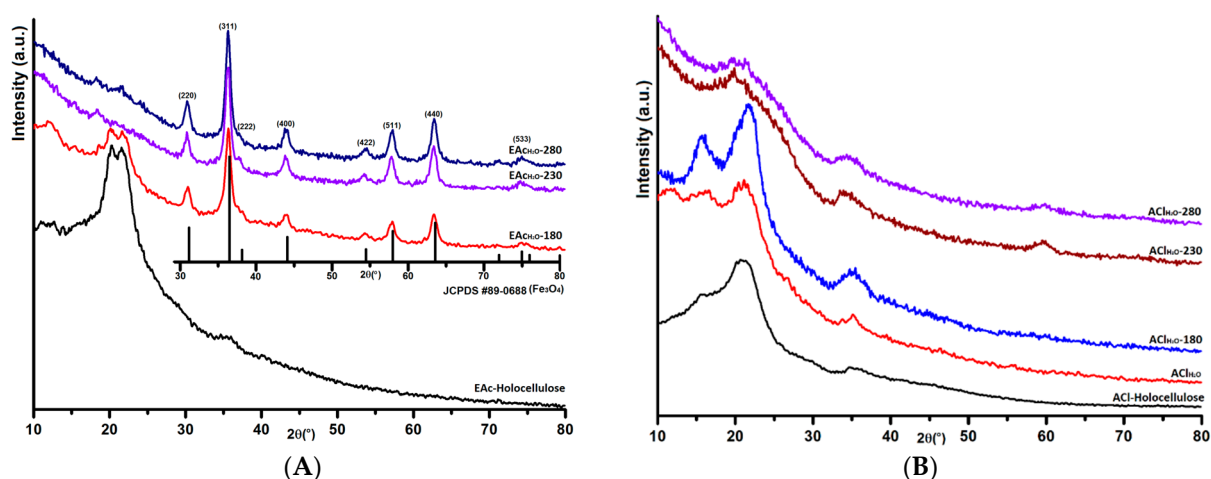

**Figure S1.** XRD patterns of the Fe<sub>3</sub>O<sub>4</sub>@C nanoparticles EAC<sub>H2O</sub> (A) and ACl<sub>H2O</sub> (B) hydrocarbonized at different temperatures.

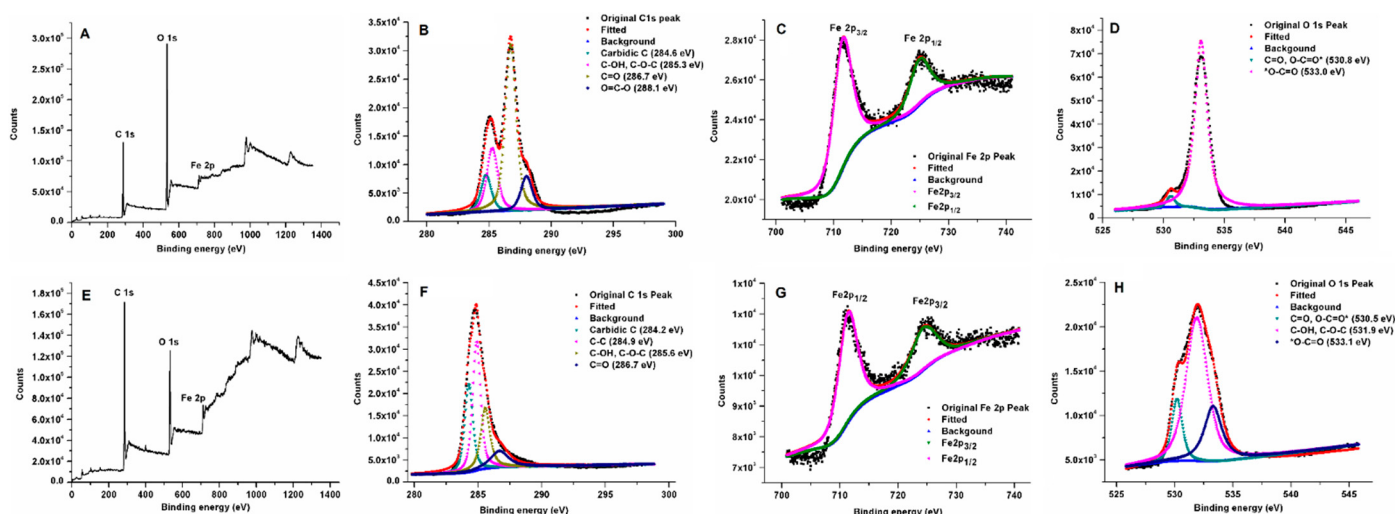

**Figure S2.** XPS spectra of the Fe<sub>3</sub>O<sub>4</sub>@C nanoparticles EAC<sub>NH3</sub> hydrocarbonized at 180 °C (A-D) and 230 °C (E-H), respectively.

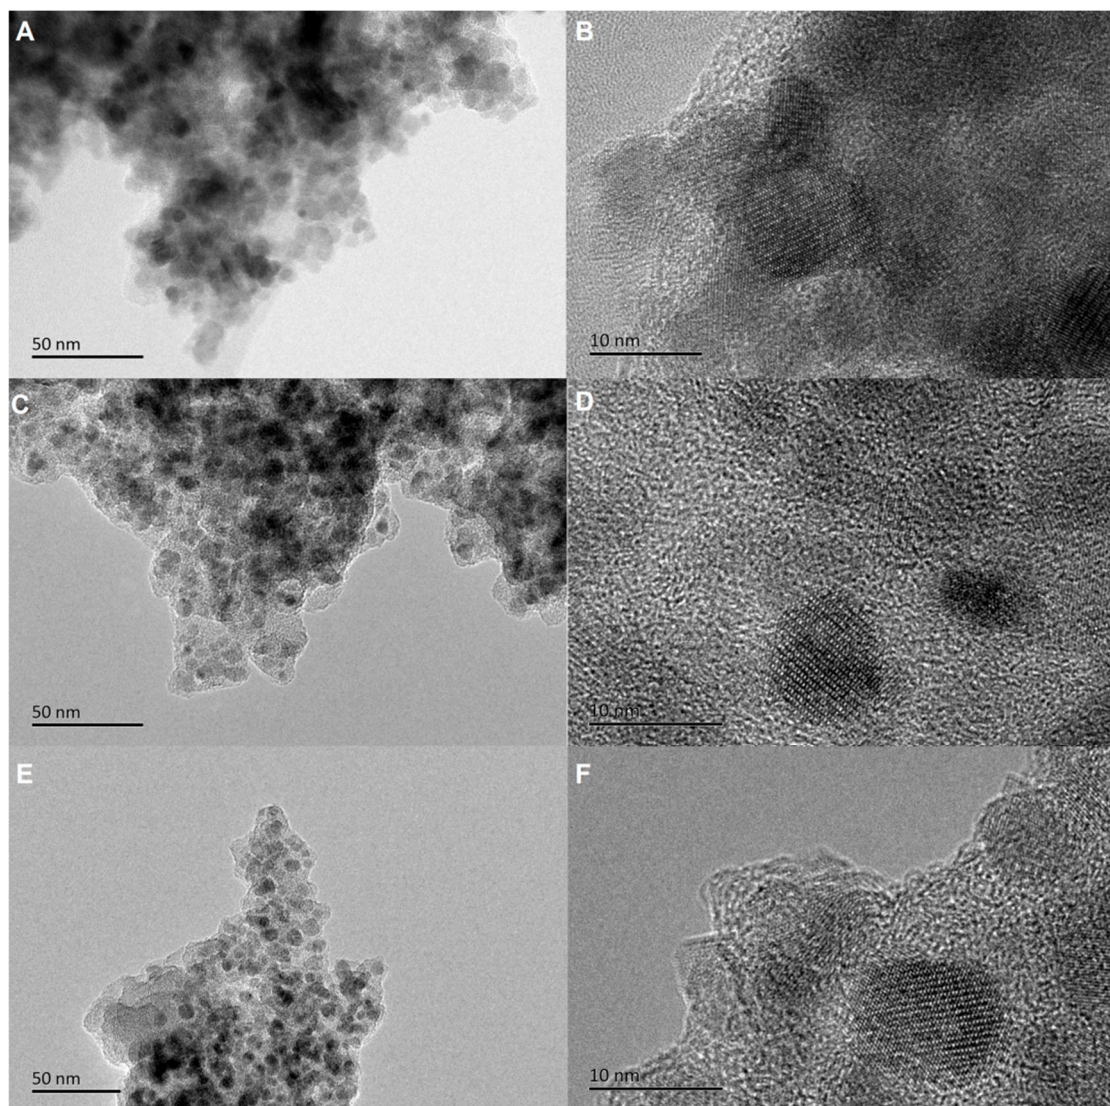

**Figure S3.** TEM and HRTEM images of the  $\text{Fe}_3\text{O}_4@\text{C}$  nanoparticles  $\text{EAC}_{\text{NH}_3}\text{-230}$  (A, B),  $\text{AC}_{\text{NH}_3}\text{-230}$  (C, D), and  $\text{AC}_{\text{NH}_3}\text{-280}$  (E, F).

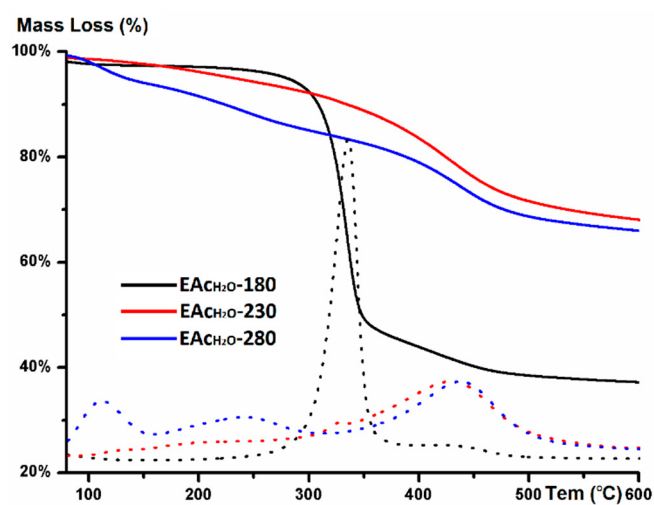

**Figure S4.** TGA analysis EmimAc dissolved holocelluloses regenerated by hot water.

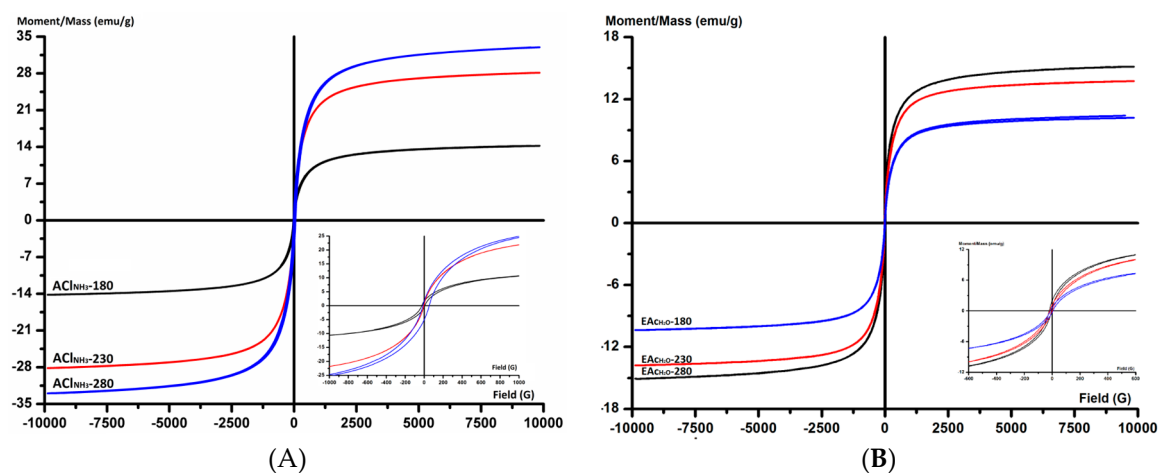

**Figure S5.** VSM magnification curves of Fe<sub>3</sub>O<sub>4</sub>@C nanoparticles derived from AmimCl dissolved holocelluloses regenerated by NH<sub>3</sub>·H<sub>2</sub>O (A) and EmimAc dissolved holocelluloses regenerated by hot water (B).
